# Supplementary material for: An enhancement to sea ice motion and age products at the National Snow and Ice Data Center (NSIDC)
Source: Copernicus journal article supplement (doi:10.5194/tc-14-1519-2020), 2020-05-07
Supplement: Supplementary file [file tc-14-1519-2020-supplement.pdf]

Supplement of The Cryosphere, 14, 1519–1536, 2020  
<https://doi.org/10.5194/tc-14-1519-2020-supplement>  
© Author(s) 2020. This work is distributed under  
the Creative Commons Attribution 4.0 License.

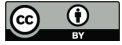

*Supplement of*

## **An enhancement to sea ice motion and age products at the National Snow and Ice Data Center (NSIDC)**

**Mark A. Tschudi et al.**

*Correspondence to:* Mark A. Tschudi ([mark.tschudi@colorado.edu](mailto:mark.tschudi@colorado.edu))

The copyright of individual parts of the supplement might differ from the CC BY 4.0 License.

## 1 **S1. Evaluation of uncertainties in source data motion estimates**

2  
3 The number and types of individual sources have changed over the ice motion product time series.  
4 Each source has different error characteristics based on the source and the method to estimate  
5 motion. As noted in the main text, Section 2.2, there have been several studies of motion estimate  
6 uncertainties, most focused on passive microwave motions derived from SSMI/SSMIS and  
7 AMSR-E imagery. These evaluations have been done via comparisons with buoy estimates. Buoy  
8 position is known very precisely and thus displacement and motion can be accurately retrieved.  
9 Thus, buoys act as a source of the “true” motion for validation.

10  
11 Such comparisons were done early on in the product development and were used to derive the  
12 relative quality of the different source – i.e., the values of  $C$  in Equation 1. These  $C$  values have  
13 been used since without change. Here we provide a brief analysis of the source data via comparison  
14 with buoy source. This is not intended to be a complete validation study of each of the source  
15 motions. It is meant to give users of the product a general sense of the accuracy of the source  
16 motions.

17  
18 The comparison method used all valid buoy motions over the given time period. For each buoy,  
19 the closest source motion estimate was found with a limit of 50 km (only source observations  
20 within 50 km of the buoy) were included. The  $u$ -component and  $v$ -component of motion, on the  
21 EASE grid, were compared between the source and the buoy for each day. All comparisons over  
22 the time period were used to calculate a bias (mean difference, e.g.,  $u_{\text{source}} - u_{\text{buoy}}$ ) and an Error  
23 Standard Deviation (Table S1). For each source, a typical year was chosen and statistics were  
24 calculated for winter (January through March) and summer (June through August). Particularly  
25 for the microwave estimates, this represents a period of optimal performance (winter) and a period  
26 with low performance (summer). For SMMR, summer estimates were very limited and there was  
27 not a large enough sample to effectively calculate statistics, so only winter is provided.

28  
29 Overall, the statistics recapitulate what has been shown in previous studies. Passive microwave  
30 estimates generally have higher errors than AVHRR because of the lower spatial resolution. And  
31 spatial resolution of the source passive microwave imagery is a key factor in the error; higher  
32 spatial resolution imagery have lower Error Standard Deviation values. Note that SMMR Error

33 Standard Deviation values are relatively low because SMMR imagery is every other day and the  
34 daily value is a result of averaging between days, which reduces the noise in motion estimates.

35

36 One feature that is noticeable is the high errors in SSMI during summer, particularly the bias. This  
37 is not surprising given the difficulties in retrieving surface properties during the melt season. This  
38 perhaps argues against inclusion of SSMI (and SSMIS, which has similar characteristics) in the  
39 combined product during summer. However, the approach used in the product is to use all available  
40 inputs throughout the year. During summer, the number of vectors is lower, particularly for 85  
41 GHz, so the impact of these lower quality vectors is relatively small compared to the buoys and  
42 the complete field of wind-derived motions. AMSR-E is also affected by surface melt, but its  
43 summer errors are not as high as SSMI, likely due to the higher spatial resolution.

44

45 Of note also is that the wind-derived motion error statistics are comparable to the passive  
46 microwave estimates, even lower in many cases (especially summer). This indicates that winds  
47 should not necessarily be lower weighted than the other satellite sources. It also suggests that the  
48 product's use of an ice/wind speed ratio of 1% is not unreasonable, though 2% may yield  
49 improvement, as shown in Table 4 of the main text.

50

51 This brief study indicates that the simplified values of  $C$  are not optimal. This presents an avenue  
52 to improve the combined motion product in a future version.

53

## 54 **S2. Validation of combined motions with CRREL buoys**

55

56 The combined daily motions are validated in the Arctic through comparison with independent  
57 buoys from the CRREL Ice Mass Balance Buoy program [*Perovich et al.*, 2020]. We compared  
58 estimates to 101 CRREL buoys from 2000-2016. The total number of buoy-combined motion  
59 observation pairs varied over 2000-2016, from a high of 3016 in 2007 to a low of 249 in 2002. A  
60 small number (<0.1%) of CRREL observations with erroneous velocities that were obviously too  
61 large were removed from the comparisons. Overall, there are a total of 25,392 pairs over the 17-  
62 year period, an average of 1494 per year. A map of the buoy tracks during 2015 is given in Figure  
63 S1 as an example of the coverage and the trajectories of buoy motions. In 2015, the year used for

64 the evaluation of the sensitivity of the wind-ice speed relationship, the 9 buoys resulted in a total  
65 of 2025 paired observations.

66  
67 All of the CRREL buoy positions were converted to EASE grid coordinates and the u-component  
68 and v-component of velocity (relative to the EASE grid) was derived from the change in position  
69 over a 24-hour period. The combined gridded estimate closest to each CRREL buoy was selected  
70 for comparison; thus, each comparison was made generally within ~25 km. The results (Table S2)  
71 show that biases are around -0.1 cm/s for the u-component and around -0.66 to -0.69 cm/s for the  
72 v-component. Most notably, the biases were slightly reduced in Version 4, indicating that the  
73 improvements in processing do result in improved accuracy of the motions. Similarly, the error  
74 standard deviations are around 4 cm/s for both velocity components and Version 4 reduces this  
75 error by ~0.3 cm/s over Version 3.

76  
77 A 2-dimensional histograms of the distributions of the errors relative to the CRREL buoys (Figure  
78 S2), shows more detailed error characterization. The largest number of buoy-combined motion  
79 pairs have differences  $< 1\text{cm/s}$ . Version 4 shows slightly more pairs within this range, indicating  
80 an improvement over Version 3, in agreement with the statistics in Table S2.

81  
82 As noted in Section 2.1 of the main text on *Reanalysis winds*, for the wind forcing, we used a 1%  
83 scale factor for the ice speed relative to wind speed. Other assessments have shown that 2% may  
84 be more legitimate, especially in recent years with the observed positive trend in ice speed. To  
85 investigate the potential effect of underestimating ice speed from winds in our product, we  
86 compared the combined motion fields with both 1% and 2% scale factors to the 2015 CRREL buoy  
87 observations. There were a total of 2025 comparison for 2015. The results indicate little effect due  
88 to wind speed (Table S3), which is expected since the weighting of the wind-driven motion is  
89 lower than other sources. The comparison indicates that the magnitude of the bias changes little  
90 for the u-component, but actually increases for the v-component. The error standard deviations  
91 decrease, generally by ~0.5 cm/s. This suggests that 2% may indeed be an improvement, but the  
92 impact on the combined gridded is relatively small. Of course, the relationship between wind speed  
93 and ice motion is complicated and can be quite variable. It depends on the compactness of the ice  
94 cover, thickness, and wind direction relative to nearby coasts. We plan to investigate the

95 relationship further in the future, both regionally (for different sea ice conditions) and temporally  
 96 (to investigate the effect of the long-term trend toward increasing speeds).

97  
 98 **Table S1.** Error estimates for selected periods from the source motion estimates. All values are in  
 99 cm/s. The Number column indicates the total number of buoy-source matches used in the statistics.  
 100 The bias columns given the average difference in the motion components (source minus buoy) and  
 101 the SD diff column provides the standard deviation of the difference.

| Year | Source  | Season | Number | <i>u</i> bias | <i>v</i> bias | <i>u</i> SD diff | <i>v</i> SD diff |
|------|---------|--------|--------|---------------|---------------|------------------|------------------|
| 1985 | SMMR    | JFM    | 284    | -0.18         | 0.06          | 3.66             | 3.39             |
| 1995 | AVHRR   | JFM    | 271    | 0.70          | 0.29          | 4.00             | 3.53             |
|      |         | JJA    | 80     | -0.53         | 0.29          | 4.95             | 3.78             |
| 2005 | AMSR-E  | JFM    | 1195   | -0.07         | -0.20         | 3.78             | 3.68             |
|      |         | JJA    | 175    | 0.67          | 1.02          | 4.53             | 4.98             |
|      | SSMI 37 | JFM    | 103    | 0.00          | 1.30          | 6.44             | 8.84             |
|      |         | JJA    | 93     | -2.52         | 0.96          | 7.64             | 10.32            |
|      | SSMI 85 | JFM    | 964    | -0.05         | 0.16          | 4.57             | 4.53             |
|      |         | JJA    | 69     | -2.07         | 3.67          | 6.79             | 9.14             |
|      | Wind    | JFM    | 1254   | 0.48          | 0.73          | 4.36             | 5.13             |
|      |         | JJA    | 2101   | 0.55          | 0.72          | 4.15             | 4.45             |

102  
 103  
 104

**Table S2.** Validation statistics from comparison with CRREL buoys.

|                       | <i>u</i> -component (cm/s) | <i>v</i> -component (cm/s) |
|-----------------------|----------------------------|----------------------------|
| <b>Bias</b>           |                            |                            |
| <i>Version 3</i>      | -0.115                     | -0.687                     |
| <i>Version 4</i>      | -0.111                     | -0.660                     |
| <b>Error St. Dev.</b> |                            |                            |
| <i>Version 3</i>      | 4.20                       | 4.32                       |
| <i>Version 4</i>      | 3.90                       | 4.03                       |

105  
 106  
 107  
 108

**Table S3.** Comparison with CRREL buoys of combined motions using different wind-speed scaling.

|                         | <i>u</i> -component (cm/s) | <i>v</i> -component (cm/s) |
|-------------------------|----------------------------|----------------------------|
| <b>Bias</b>             |                            |                            |
| <i>1% of wind speed</i> | -0.267                     | -0.190                     |
| <i>2% of wind speed</i> | -0.263                     | -0.220                     |
| <b>Error St. Dev.</b>   |                            |                            |
| <i>1% of wind speed</i> | 4.95                       | 4.43                       |
| <i>2% of wind speed</i> | 4.47                       | 3.99                       |

109

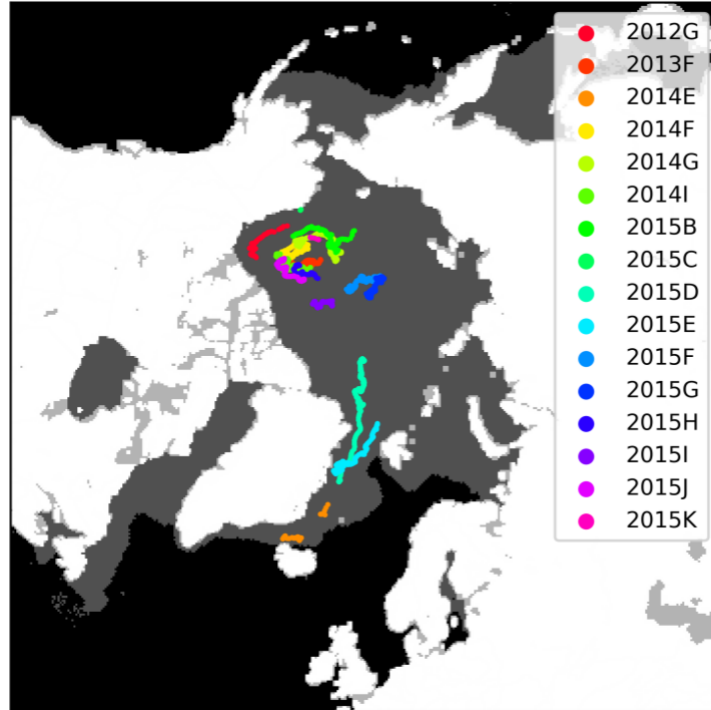

**Figure S1.** Map of CRREL buoy positions for 2015. The buoy IDs are color coded with the legend providing the CRREL buoy identifier; the year in the ID is the year of buoy deployment. All buoys that collected data during 2015 are shown except for buoys that were deployed on fast ice.

110  
111  
112  
113  
114  
115  
116

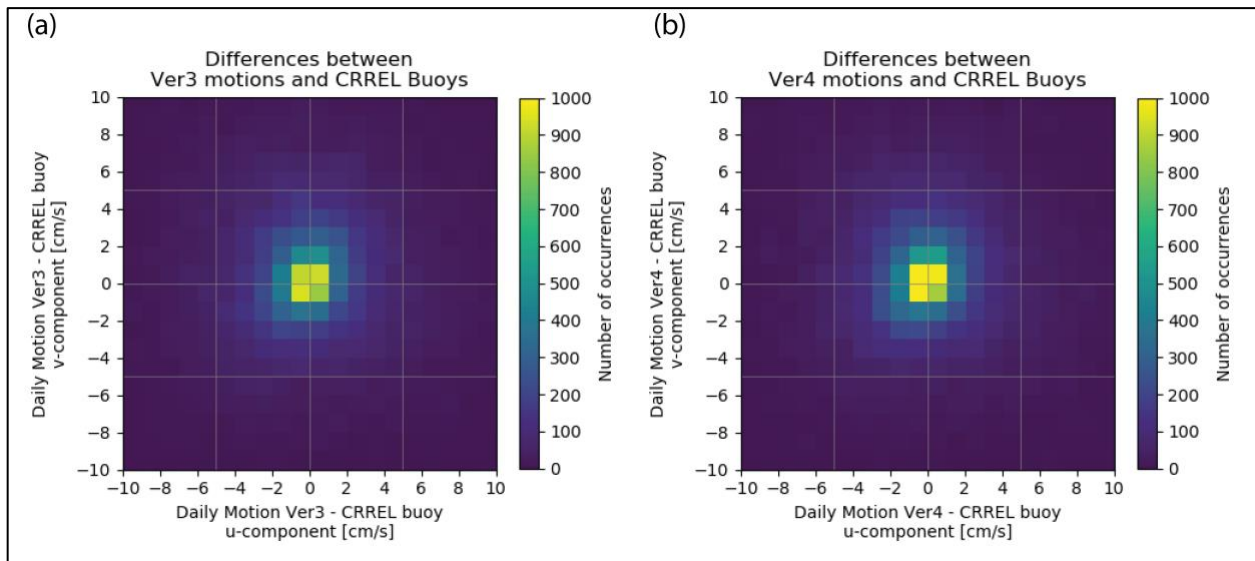

**Figure S2.** Two-dimensional histogram of combined motion error distribution relative to CRREL buoys for (a) Version 3 and (b) Version 4, binned into 1 cm/s increments. The  $v$ -component error is on the y-axis with the  $u$ -component error on the x-axis. The color scale indicates the number of occurrences within each bin.

117  
118  
119  
120  
121  
122  
123

124 *Supplemental References*

125

126 Perovich, D., J. Richter-Menge, and C. Polashenski, Observing and understanding climate change:

127 Monitoring the mass balance, motion, and thickness of Arctic sea ice, <http://imb-crrel->

128 [dartmouth.org/archived-data](http://imb-crrel-dartmouth.org/archived-data), 2020.

129
